# Supplementary material for: Selection of Yeast and Lactic Acid Bacteria Strains, Isolated from Spontaneous Raw Milk Fermentation, for the Production of a Potential Probiotic Fermented Milk
Source: MDPI journal article supplement (doi:10.3390/fermentation8080407), 2022-08-19
Supplement: s1 [file s1]

**Table S1.** Cluster with representative strains and source of isolation of the yeasts from the spontaneous fermentation at 30 °C and 40 °C after 24 h and 48 h, and from raw milk. NC: Single strain not included in any cluster.

| Cluster and representative strain          | Isolates                                                                       | Source of isolation |
|--------------------------------------------|--------------------------------------------------------------------------------|---------------------|
| I<br><i>Kluyveromyces marxianus</i> MK Y58 | MK Y53                                                                         | 40 °C 24 h          |
|                                            | MK Y58                                                                         | 40 °C 48 h          |
| II<br><i>K. marxianus</i> MK Y41           | MK Y41; MK Y42; MK Y43; MK Y44; MK Y45; MK Y46                                 | 30 °C 24 h          |
| III<br><i>K. marxianus</i> MK Y55          | MK Y38; MK Y39; MK Y61;                                                        | 30 °C 24 h          |
|                                            | MK Y63                                                                         | 30 °C 48 h          |
|                                            | MK Y55; MK Y62; MK Y65; MK Y66; MK Y57                                         | 40 °C 24 h          |
| IV<br><i>Candida jadinii</i> MK Y1         | MK Y1                                                                          | 30 °C 24 h          |
|                                            | MK Y8; MK Y9; MK Y10; MK Y7                                                    | 30 °C 48 h          |
|                                            | MK Y11; MK Y12                                                                 | 40 °C 24 h          |
| V<br><i>C. jadinii</i> MK Y6               | MK Y3; MK Y4                                                                   | 30 °C 24 h          |
|                                            | MK Y6                                                                          | 30 °C 48 h          |
| VI<br><i>C. jadinii</i> MK Y31             | MK Y3                                                                          | 30 °C 24 h          |
|                                            | MK Y31                                                                         | 30 °C 48 h          |
| VII<br><i>Magnusiomyces capitatus</i>      | MK Y20; MK Y25; MK Y27; MK Y30; MK Y26; MK Y35; MK Y16; MK Y17; MK Y18; MK Y19 | 40 °C 48 h          |
| VIII<br><i>M. capitatus</i>                | MK Y54; MK Y56                                                                 | 40 °C 24 h          |
| IX<br><i>K. marxianus</i> MK Y47           | MK Y47; MK Y51                                                                 | 30 °C 48 h          |
| X<br><i>Pichia kudriavzevii</i> MK Y22     | MK Y22                                                                         | 40 °C 24 h          |
|                                            | MK Y24                                                                         | 40 °C 48 h          |
| XI<br><i>P. kudriavzevii</i> MK Y28        | MK Y37                                                                         | 40 °C 24 h          |
|                                            | MK Y28; MK Y29                                                                 | 40 °C 48 h          |
| XII<br><i>P. kudriavzevii</i> MK Y5        | MK Y5; MK Y36                                                                  | 30 °C 48 h          |
| XIII<br><i>Diutina rugosa</i> MK Y13       | MK Y13; MK Y34                                                                 | 40 °C 24 h          |
| XIV<br><i>Candida inconspicua</i> MK Y52   | MK Y52; MK Y64                                                                 | 30 °C 48 h          |
|                                            | MK Y59; MK Y60; MK Y67; MK Y68; MK Y69; MK Y70                                 | Raw milk            |
| XV<br><i>C. inconspicua</i> MK Y21         | MK Y14; MK Y21                                                                 | 40 °C 24 h          |
| NC                                         | <i>K. marxianus</i> MK Y50                                                     | 40 °C 24 h          |
|                                            | <i>K. marxianus</i> MK Y40                                                     | 30 °C 24 h          |
|                                            | <i>K. marxianus</i> MK Y48                                                     | 30 °C 24 h          |
|                                            | <i>C. jadinii</i> MK Y2                                                        | 30 °C 48 h          |
|                                            | <i>C. jadinii</i> MK Y15                                                       | 30 °C 24 h          |
|                                            | <i>D. rugosa</i> MK Y32                                                        | 40 °C 48 h          |
|                                            | <i>D. rugosa</i> MK Y49                                                        | 30 °C 48 h          |
|                                            | <i>C. inconspicua</i> MK Y23                                                   | 40 °C 48 h          |

**Table S2.** Microbial concentration and pH values after 28 days of storage. Different letters in the same raw correspond to significant differences ( $p < 0.05$ ).

|                               | FM-S                              | FM-B                             |
|-------------------------------|-----------------------------------|----------------------------------|
| Lactic acid bacteria (CFU/mL) | $(1.66 \pm 0.44) \times 10^{10b}$ | $(8.74 \pm 0.12) \times 10^{9a}$ |
| Yeasts (CFU/mL)               | $(4.04 \pm 0.84) \times 10^7$     | $(3.43 \pm 0.75) \times 10^7$    |
| Final pH                      | $3.61 \pm 0.04^a$                 | $4.09 \pm 0.09^b$                |
